# Supplementary material for: Self-standing 2D/2D Co3O4@FeOOH nanosheet arrays as promising catalysts for the oxygen evolution reaction
Source: Royal Society of Chemistry journal article supplement (doi:10.1039/d2dt03708d), 2023-01-01
Supplement: d2dt03708d1.pdf [file d2dt03708d1.pdf]

## Supporting Information

### Self-standing 2D/2D $\text{Co}_3\text{O}_4@\text{FeOOH}$ Nanosheet Arrays as Promising Catalyst for Oxygen Evolution Reaction

Xingyu Wang,<sup>a</sup> Rui Xiang,<sup>\*a</sup> Su Li,<sup>a</sup> Kejin Song,<sup>a</sup> Wenzhang Huang<sup>a</sup>

College of Chemistry and Chemical Engineering, Chongqing University of Science & Technology, Chongqing, 401331, China.

Email: 2019045@cqust.edu.cn

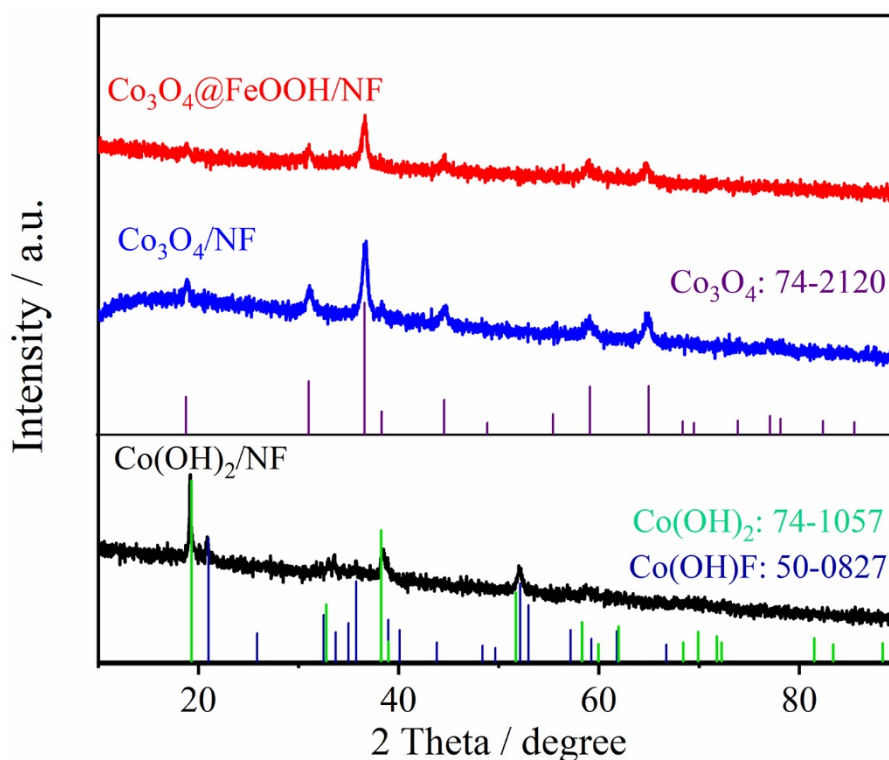

Figure S1. XRD pattern of  $\text{Co}(\text{OH})_2$  nanosheet arrays (black line),  $\text{Co}_3\text{O}_4$  nanosheet arrays (blue line) and  $\text{Co}_3\text{O}_4@\text{FeOOH}$  nanosheet arrays (red line)

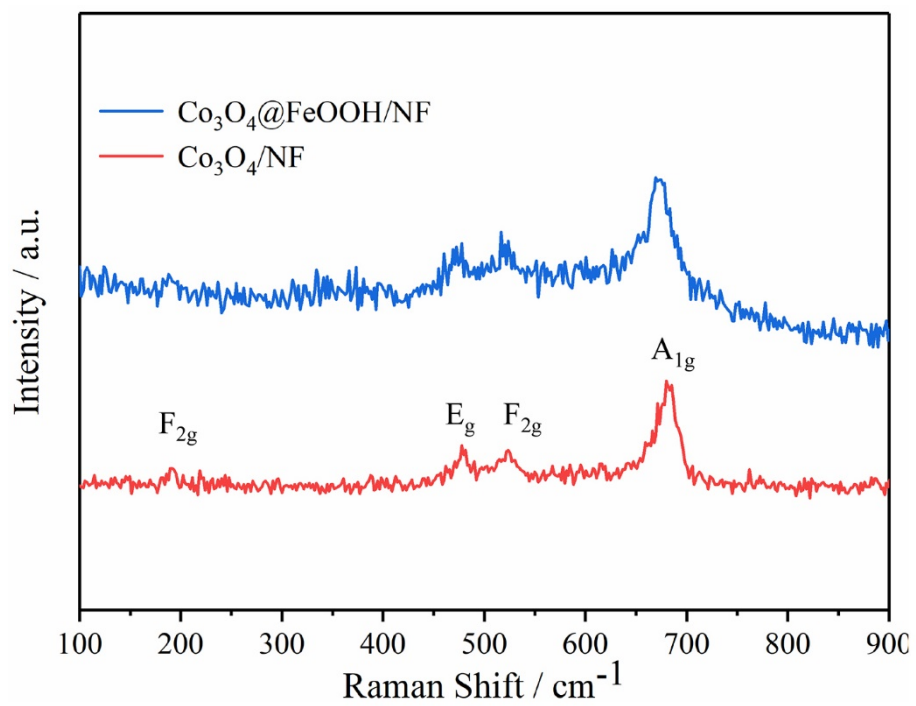

Figure S2. Raman spectra of  $\text{Co}_3\text{O}_4/\text{NF}$  (red line) and  $\text{Co}_3\text{O}_4@\text{FeOOH}/\text{NF}$  (blue line)

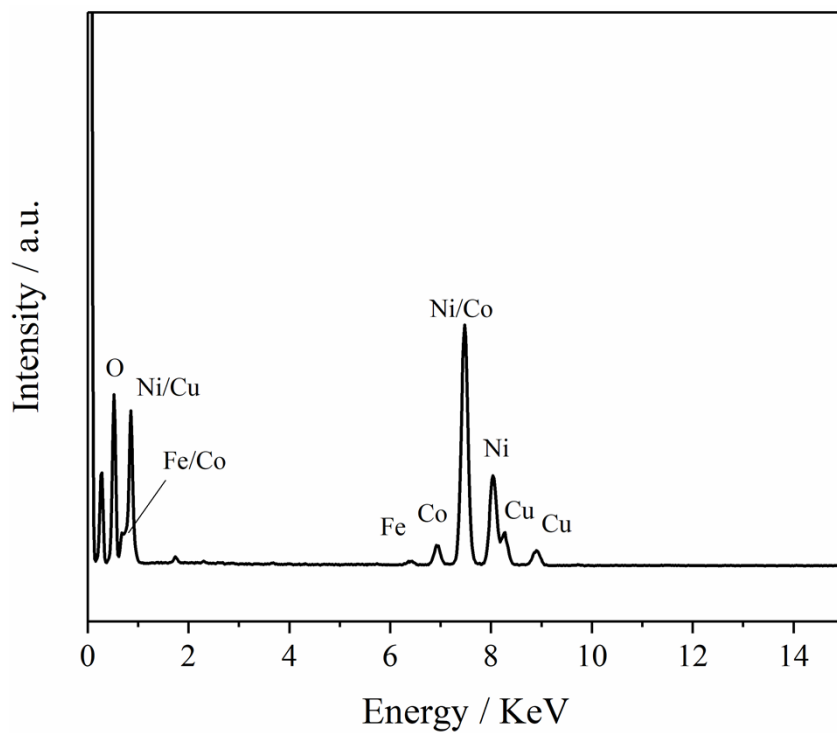

Figure S3. EDX spectrum of  $\text{Co}_3\text{O}_4@\text{FeOOH}$  nanosheets.

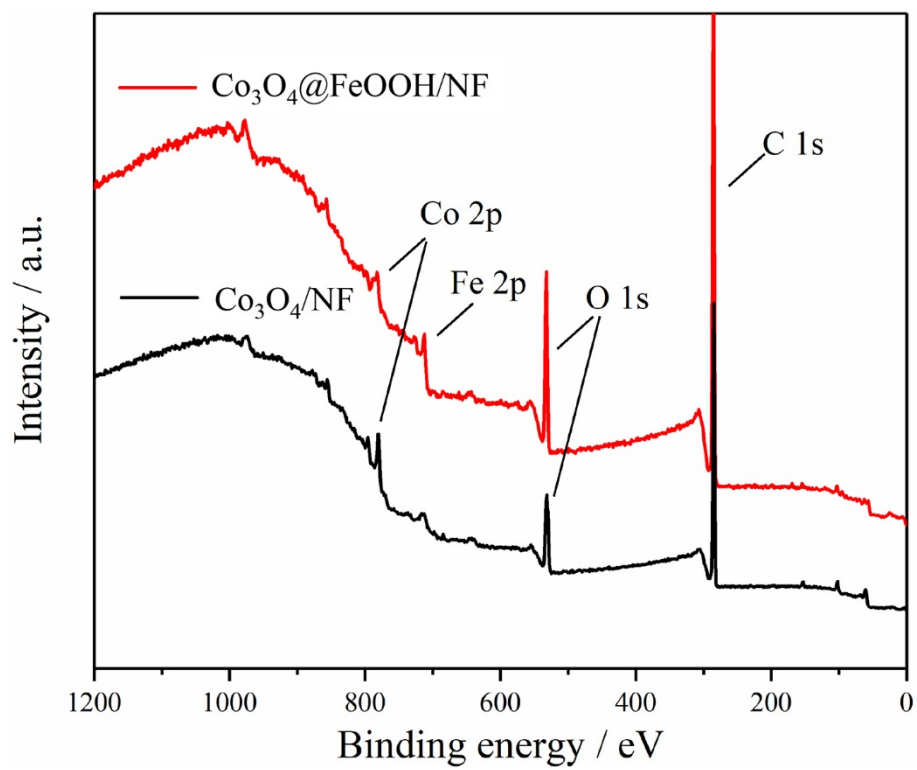

Figure S4. Survey XPS spectra of  $\text{Co}_3\text{O}_4@\text{FeOOH}/\text{NF}$  (red) and  $\text{Co}_3\text{O}_4/\text{NF}$  (black)

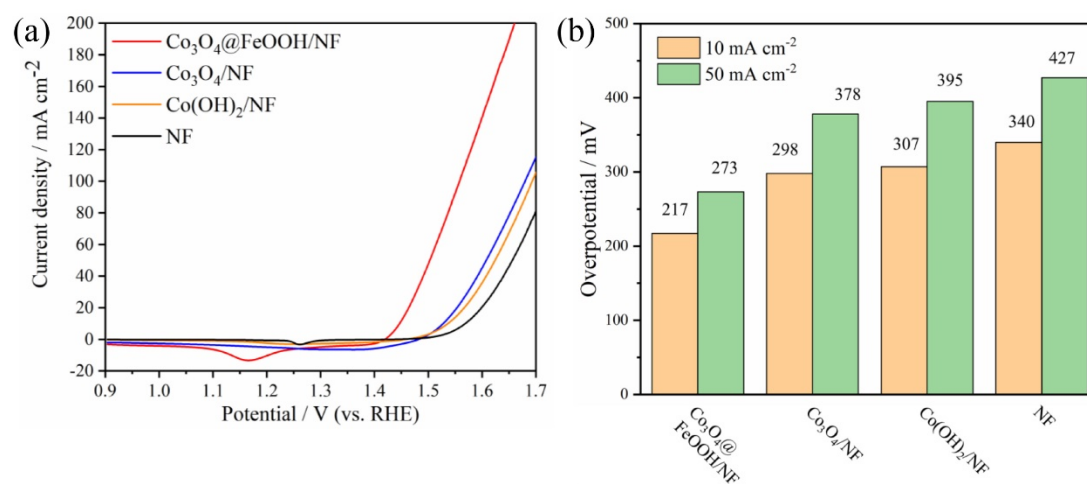

Figure S5. (a) polarization curves of Co<sub>3</sub>O<sub>4</sub>@FeOOH/NF, Co<sub>3</sub>O<sub>4</sub>/NF, Co(OH)<sub>2</sub>/NF and NF without iR compensation; (b) bar graph of overpotentials derived from polarization curves.

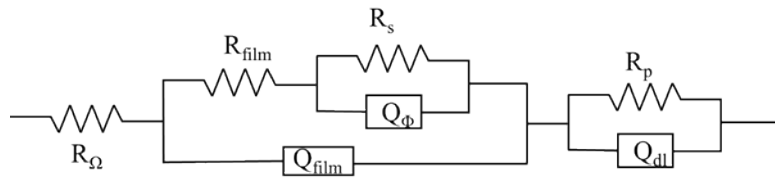

Figure S6. The equivalent circuit used for modeling the measured electrochemical response.  $R_{\Omega}$  represents solution resistance;  $Q_{\text{film}}$  and  $R_{\text{film}}$  are represented as the dielectric property and resistance of catalyst film, respectively.  $Q_d$  is related to double layered capacitance and  $Q_{\phi}$  models the relaxation of the charge associated with the adsorbed intermediate.  $R_s$  and  $R_p$  are related with the kinetics of the interfacial charge transfer reaction. When resistance of oxide film is negligible compared with solution resistance, this equivalent circuit is equal to that of the conventional model of  $R(RQ)$ . Note that, as the electrodes in our work featuring porous nature, constant phase element (CPE) was selected instead of capacitance element that was chosen in the literature reference.

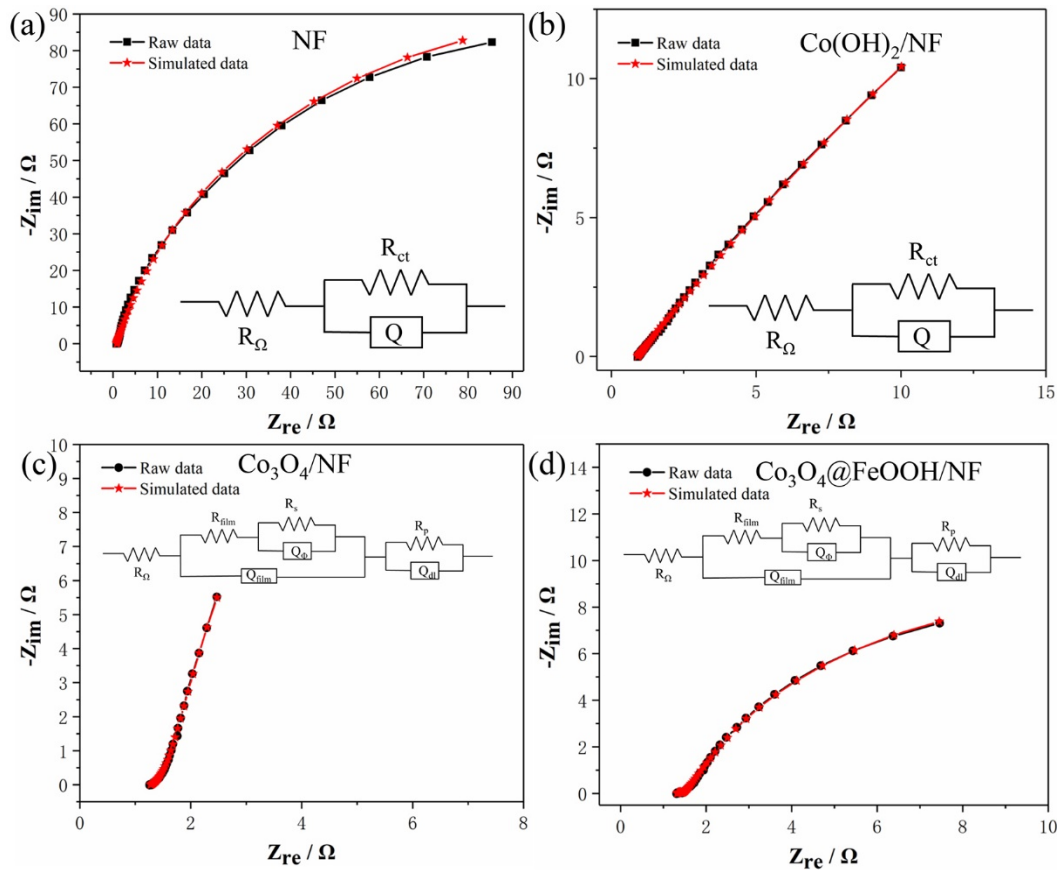

Figure S7. Equivalent circuit simulation results of NF (a),  $\text{Co}(\text{OH})_2/\text{NF}$  (b),  $\text{Co}_3\text{O}_4/\text{NF}$  (c) and  $\text{Co}_3\text{O}_4@\text{FeOOH}/\text{NF}$  (d).

Table S1. Optimum values of circuit elements for NF,  $\text{Co}(\text{OH})_2/\text{NF}$ ,  $\text{Co}_3\text{O}_4/\text{NF}$  and

Co<sub>3</sub>O<sub>4</sub>@FeOOH/NF by fitting the impedance data of Figure S11

| Electrode name                           | Element value               |                         |              |               |
|------------------------------------------|-----------------------------|-------------------------|--------------|---------------|
| NF                                       | $R_{\Omega} = 0.829 \Omega$ | $R_{ct} = 233.3 \Omega$ |              |               |
| Co(OH) <sub>2</sub> /NF                  | $R_{\Omega} = 0.905$        | $R_{ct} = 146.8$        |              |               |
| Co <sub>3</sub> O <sub>4</sub> /NF       | $R_{\Omega} = 1.27$         | $R_{film} = 0.31$       | $R_S = 1.31$ | $R_S = 76.59$ |
| Co <sub>3</sub> O <sub>4</sub> @FeOOH/NF | $R_{\Omega} = 1.32$         | $R_{film} = 0.73$       | $R_S = 0.12$ | $R_S = 18.76$ |

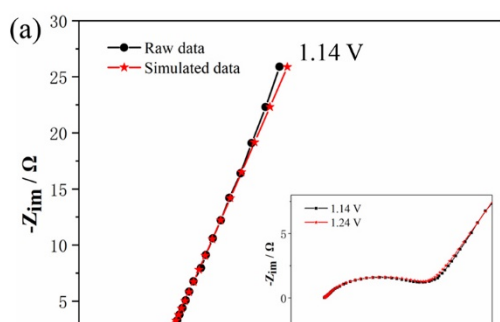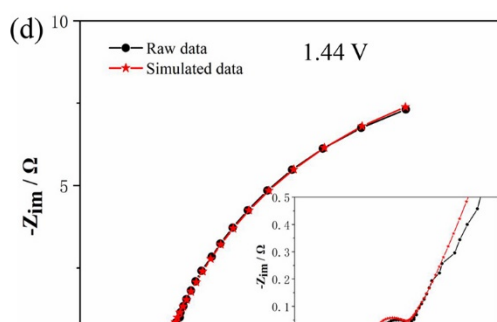

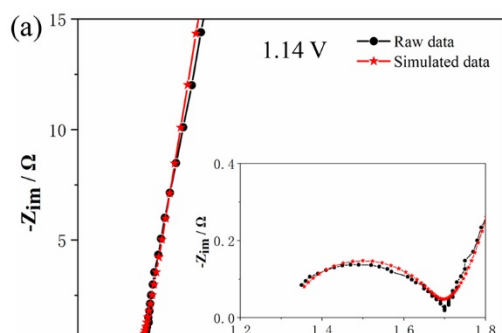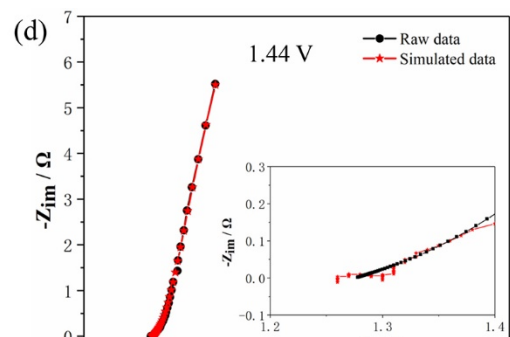



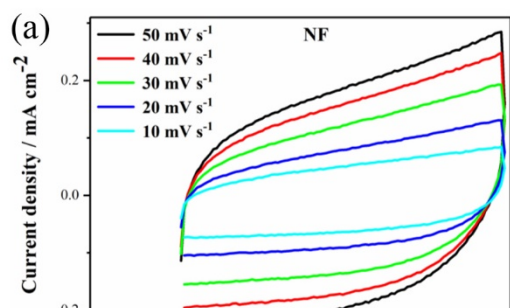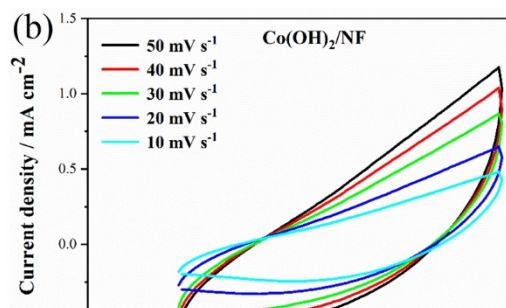

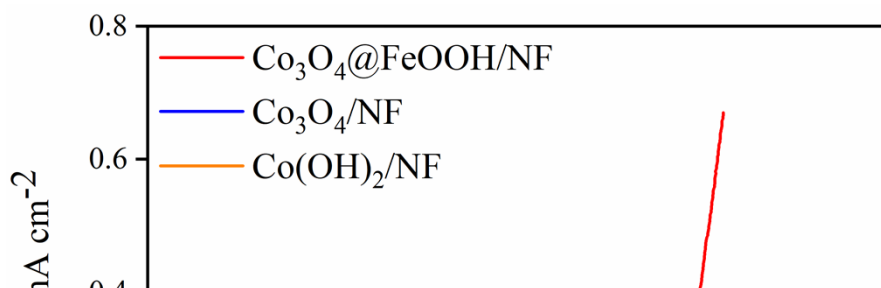

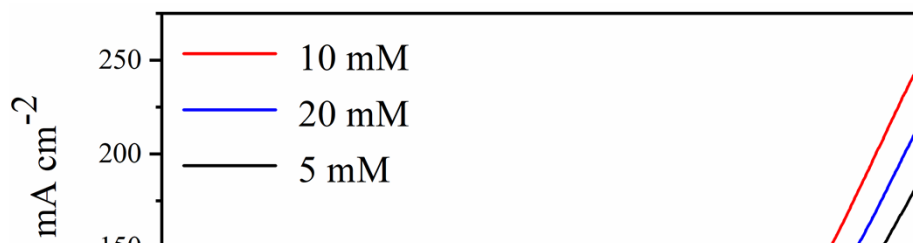

Figure S12. polarization curves of  $\text{Co}_3\text{O}_4@\text{FeOOH}/\text{NF}$  obtained under 5 mM (black line), 10 mM (red line) and 20 mM (blue line)  $(\text{NH}_4)_2\text{Fe}(\text{SO}_4)_2$  solution.

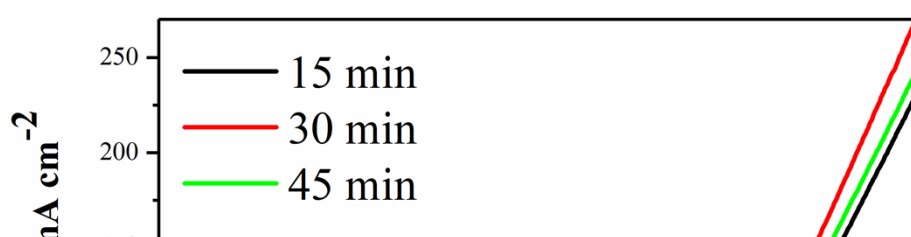

Figure S13. polarization curves of  $\text{Co}_3\text{O}_4@\text{FeOOH}/\text{NF}$  obtained with the reaction time of 15 min (black line), 30 min (red line) and 45 min (green line).

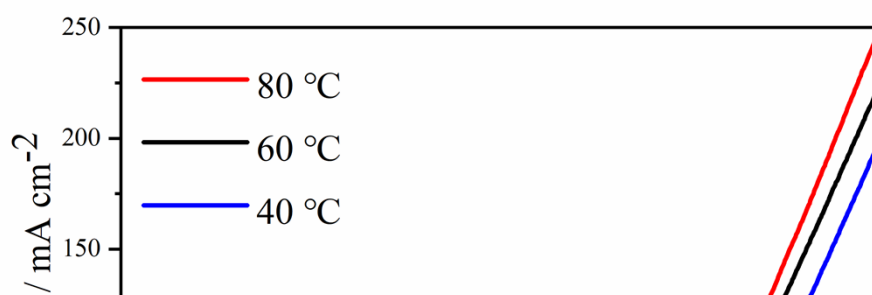

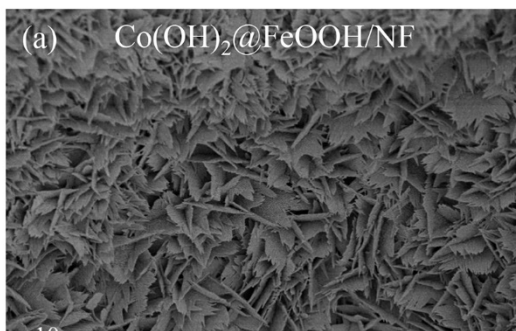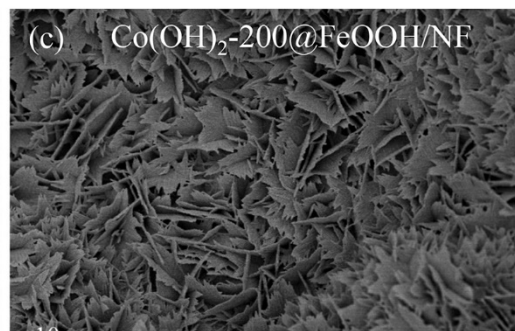

Intensity / a.u.

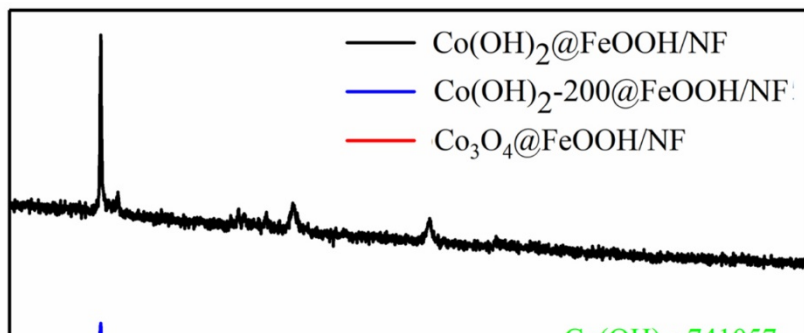

Table S1. Comparison of the OER performance of **Sample 1** with the recently reported cobalt based catalysts.

| Electrocatalyst | electrolyte | j<br>mA | $\eta_j$<br>mV | Tafel<br>slop | Durability<br>h | Ref. |
|-----------------|-------------|---------|----------------|---------------|-----------------|------|
|-----------------|-------------|---------|----------------|---------------|-----------------|------|



|                                                                |           | cm <sup>2</sup> |                   | mV dec <sup>-1</sup> |     |                                                    |
|----------------------------------------------------------------|-----------|-----------------|-------------------|----------------------|-----|----------------------------------------------------|
| Co <sub>3</sub> O <sub>4</sub> @FeOOH/NF                       | 1.0 M KOH | 10<br>50<br>100 | 209<br>235<br>253 | 48.9                 | 24  | This work                                          |
| FeOOH(Se)/IF                                                   | 1.0 M KOH | 10<br>100       | 287<br>364        | 54                   | 15  | J. Am. Chem. Soc. 2019, 141, 7005–7013             |
| S-FeOOH/CC                                                     | 1.0 M KOH | 10<br>50<br>100 | 244<br>287<br>308 | 59                   | 100 | Adv. Funct. Mater. 2022, 32, 2112674               |
| FeOOH/Ni <sub>3</sub> N                                        | 1.0 M KOH | 10              | 244               | 65                   | 50  | Appl. Catal. B: Environmental 269 (2020) 118600    |
| CoP/FeOOH                                                      | 1.0 M KOH | 10              | 250               | 56.6                 | 20  | Chem. Eng. J 428 (2022) 131130                     |
| Fe <sub>3</sub> O <sub>4</sub> /Co <sub>3</sub> S <sub>4</sub> | 1.0 M KOH | 10              | 270               | 56                   | 24  | J Mater Chem A, 2017, 5(19): 9210-6                |
| NiCoP/C@FeOOH                                                  | 1.0 M KOH | 10<br>50        | 271<br>321        | 69                   | 14  | Nanoscale, 2019, 11(42): 19959-68.                 |
| γ-FeOOH/NF-6M                                                  | 1.0 M KOH | 10<br>100       | 286<br>316        | 51                   | 24  | Adv. Mater. 2021, 33, 2005587                      |
| CoSe <sub>2</sub> @FeOOH<br>NAs/CC                             | 1.0 M KOH | 10              | 253               | 69                   | 20  | Adv. Mater. Interfaces 2020, 2001310               |
| Ni <sub>3</sub> S <sub>2</sub> @MoS <sub>2</sub> /FeOOH        | 1.0 M KOH | 10              | 234               | 49                   | 50  | Appl. Catal. B: Environmental 244 (2019) 1004–1012 |
| CoFeO@N/S-rGO                                                  | 1.0 M KOH | 10<br>100       | 248<br>400        | 40                   | 100 | J. Mater. Chem. A, 2018, 6, 15728–15737            |
| 3-CoFeW                                                        | 1.0 M KOH | 10              | 192               | 36                   | 30  | J. Am. Chem. Soc. 2019, 141, 1, 232–239            |
| CeO <sub>2</sub> /Co <sub>3</sub> O <sub>4</sub>               | 1.0 M KOH | 10              | 265               | 68.1                 | 20  | ACS Catal. 2019, 9, 6484–6490                      |
